# Supplementary material for: A G-quadruplex-based colorimetric assay of S1 nuclease activity and inhibition
Source: Royal Society of Chemistry journal article supplement (doi:10.1039/c5ay00743g), 2015-01-01
Supplement: c5ay00743g1.pdf [file c5ay00743g1.pdf]

## ***Supporting Information for***

### **G-quadruplex-based colorimetric assay of S1 nuclease activity and inhibition**

Bingfang Shi,<sup>a,b</sup> Yingfeng Qin,<sup>a</sup> Mengjiao Huang,<sup>a</sup> Jingjin Zhao,<sup>\*a</sup> Yubin Su<sup>a</sup> and Shulin Zhao<sup>\*a</sup>

*<sup>a</sup>Key Laboratory for the Chemistry and Molecular Engineering of Medicinal Resources (Ministry of Education of China), College of Chemistry and Chemical Engineering, Guangxi Normal University, Guilin, 541004, China.*

*<sup>b</sup> Department of Chemistry and Life Sciences, Baise University, Guangxi Baise 533000, China*

### **Table of contents**

1. Supplementary figures

|                                       |    |
|---------------------------------------|----|
| CD spectra of the system -----        | S2 |
| Optimization of assay conditions----- | S3 |

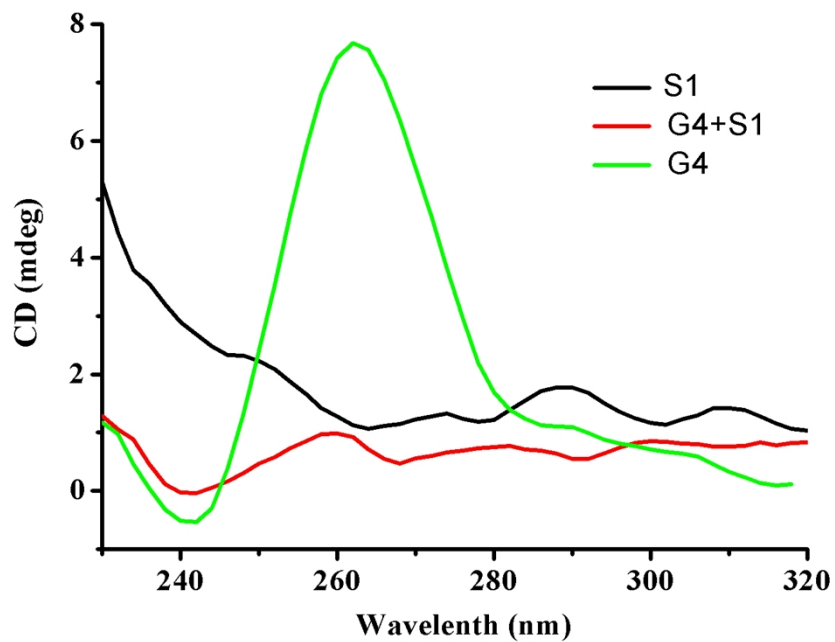

**Figure S1.** The CD spectra of the system: (1) S1 nuclease (black curve); (2) G-riched DNA+S1 nuclease (red curve); (3) G-riched DNA (green curve).

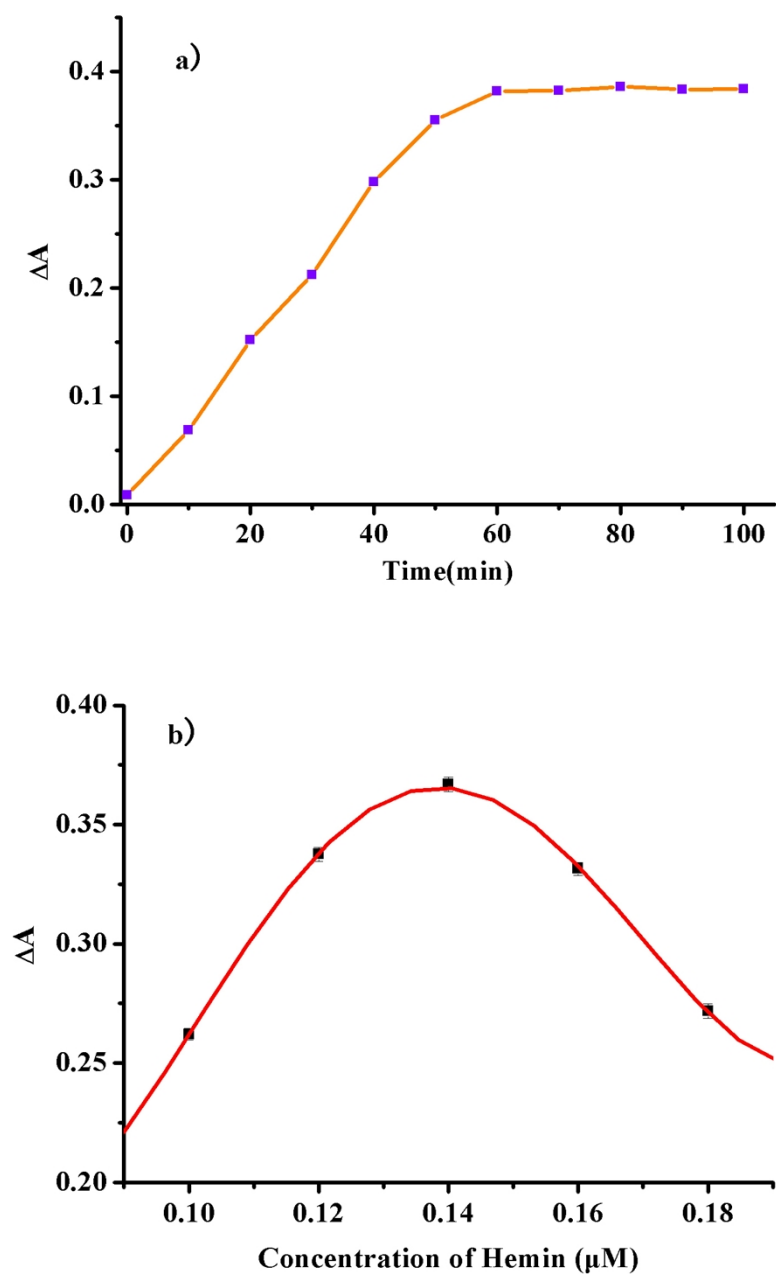

**Figure S2.** a) Effect of the reaction time on relative absorbance; b) effect of the concentration of hemin on relative absorbance. The concentrations of G-riched DNA, S1 nuclease, hemin,  $\text{H}_2\text{O}_2$  and ABTS were 0.1  $\mu\text{M}$ , 5.0  $\text{U}\cdot\text{mL}^{-1}$ , 0.14  $\mu\text{M}$ , 2.0 mM and 2.0 mM, respectively.
